# Supplementary material
Source: publisher figshare collection journal article supplement (https://future-science-group.figshare.com/ndownloader/files/34810225)
Supplement: Supplementary file 1 [file 34810225]

| **Supplementary table 1. Procedural complications from the included studies** | | | |  |
| --- | --- | --- | --- | --- |
|  | Acute kidney injury (%) | Conduction disturbance (%) | All Bleeding (%) | More than mild paravalvular aortic regurgitation (%) |
| Cavalcante (2017) | NR | NR | NR | NR |
| Nitsche (2020b) | Isolated AS 7.5 (23/305)  CA-AS 6.1 (2/37) | Isolated AS 6.4 (20/305)  CA-AS 14.7 (5/37) | Isolated AS 4.7 (14/305)  CA-AS 2.9 (1/37) | NR |
| Treibel (2016) | NR | NR | NR | NR |
| Rosenblum (2020) | Isolated AS 1.1 (2/177)  CA-AS 3.7 (1/27) | Isolated AS 13.0 (23/177)  CA-AS 19.0 (5/27) | Isolated AS 1.1 (2/177)  CA-AS Zero (0/27) | Isolated AS 24 (43/177)  CA-AS 37 (10/27) |
| NR, not reported. | | | | |
